# Supplementary material for: Optimization of an Injectable, Resorbable, Bioactive Cement Able to Release the Anti-Osteoclastogenic Biomolecule ICOS-Fc for the Treatment of Osteoporotic Vertebral Compression Fractures
Source: MDPI journal article supplement (doi:10.3390/biom13010094), 2023-01-02
Supplement: s1 [file s1]

# Optimization of an Injectable, Resorbable, Bioactive Cement Able to Release the Anti-Osteoclastogenic Biomolecule ICOS-Fc for the Treatment of Osteoporotic Vertebral Compression Fractures

Federica Banche-Niclot <sup>1</sup>, Ilaria Corvaglia <sup>1</sup>, Caterina Cavalera <sup>1</sup>, Elena Boggio <sup>2,3</sup>, Casimiro Luca Gigliotti <sup>2,3</sup>, Umberto Dianzani <sup>3</sup>, Antzela Tzagiollari <sup>4,5</sup>, Nicholas Dunne <sup>4,5</sup>, Antonio Manca <sup>6</sup>, Sonia Fiorilli <sup>1,7</sup> and Chiara Vitale-Brovarone <sup>1,7,\*</sup>

<sup>1</sup> Department of Applied Science and Technology, Politecnico di Torino, Corso Duca Degli Abruzzi 24, 10129 Torino, Italy

<sup>2</sup> NOVAICOS s.r.l.s., Via Amico Canobio 4/6, 28100 Novara, Italy

<sup>3</sup> Department of Health Sciences, Università del Piemonte Orientale, Via Solaroli 17, 28100 Novara, Italy

<sup>4</sup> Centre for Medical Engineering Research, School of Mechanical and Manufacturing Engineering, Dublin City University, D09 NA55 Dublin, Ireland

<sup>5</sup> Biodesign Europe, Dublin City University, D09 NA55 Dublin, Ireland

<sup>6</sup> Department of Radiology, Candiolo Cancer Institute, FPO-IRCCS, 10060 Torino, Italy

<sup>7</sup> National Interuniversity Consortium of Materials Science and Technology, RU Politecnico di Torino, 50121 Firenze, Italy

\* Correspondence: chiara.vitalebrovarone@polito.it.

|                                                  | <b>Density</b>                     |                        | <b>Size</b>            |             | <b>Morphology</b>                                                                     |
|--------------------------------------------------|------------------------------------|------------------------|------------------------|-------------|---------------------------------------------------------------------------------------|
| <b>ZrO<sub>2</sub></b><br>(commercial available) | 5.7 cm <sup>3</sup> /g             |                        | 100-250 nm             |             | 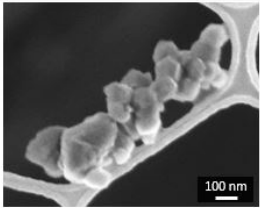 |
|                                                  | <b>Specific Surface Area (SSA)</b> | <b>Pore Volume</b>     | <b>Density</b>         | <b>Size</b> | <b>Morphology</b>                                                                     |
| <b>Sr-MBG-SG</b>                                 | 650 m <sup>2</sup> /g              | 0.7 cm <sup>3</sup> /g | 0.8 cm <sup>3</sup> /g | 100-500 nm  |  |
| <b>Sr-MBG -SD</b>                                | 100 m <sup>2</sup> /g              | 0.1 cm <sup>3</sup> /g | 2.2 cm <sup>3</sup> /g | 1-5 μm      |  |

**Figure S1.** Characteristics and morphology of the commercially available ZrO<sub>2</sub> nanoparticles exploited to impart radiopacity to the cement as well as of the two types of Sr-MBGs separately included within the formulation to impart bioactive and pro-osteogenic features.

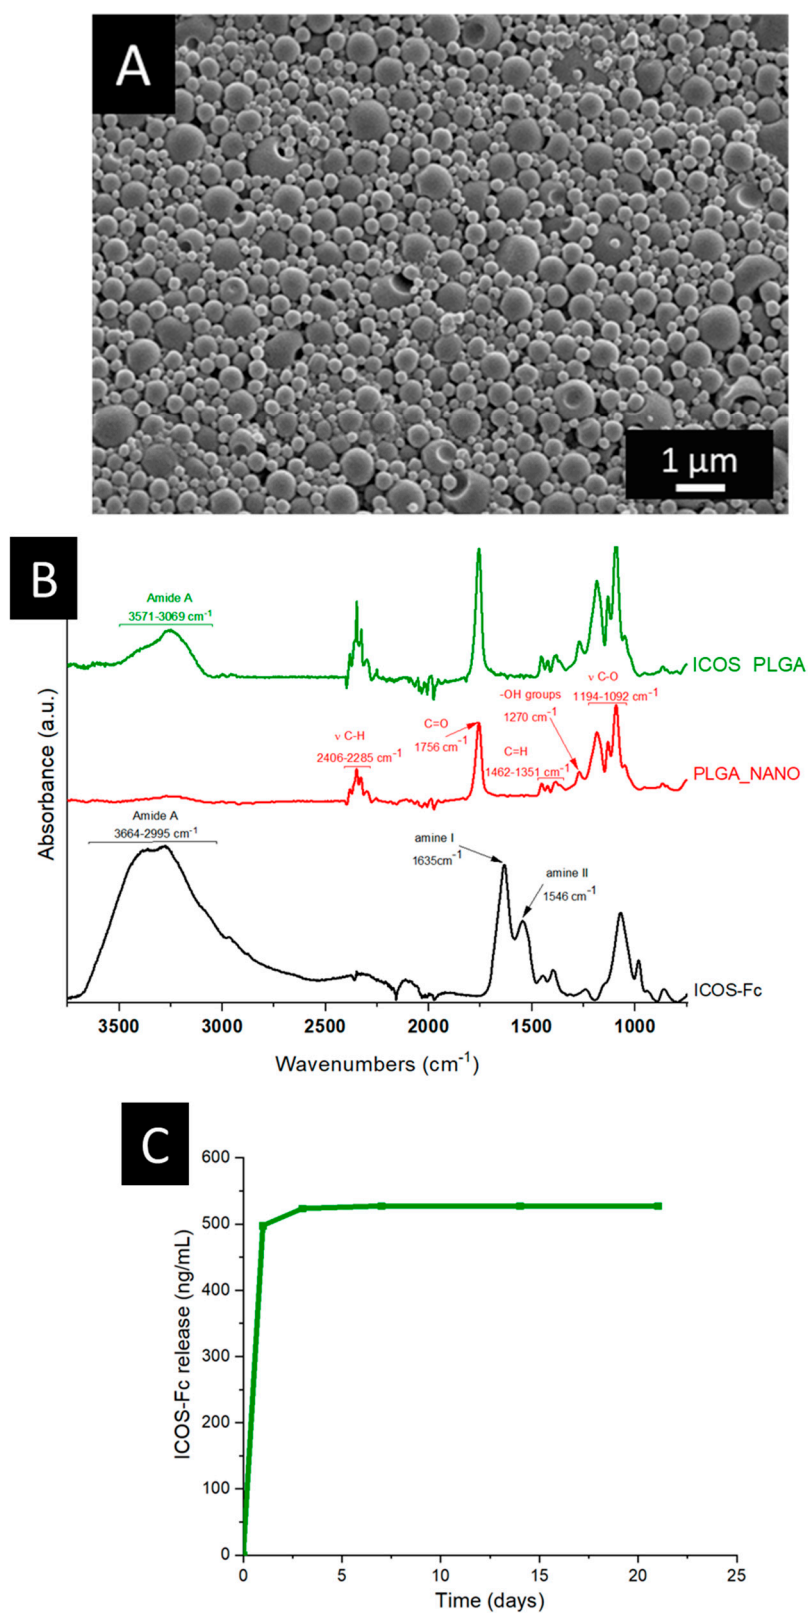

**Figure S2.** ICOS\_PLGA nanoparticles characterization: (A) FE-SEM images of ICOS\_PLGA nanoparticles (25,000 $\times$ ). (B) ATR-FTIR spectra of ICOS-Fc (black line), unloaded PLGA nanoparticles (red line) and ICOS\_PLGA carriers (green line). (C) Cumulative amount of released ICOS-Fc from PLGA nanoparticles as a function of time determined by means of Micro BCA Protein Assay.

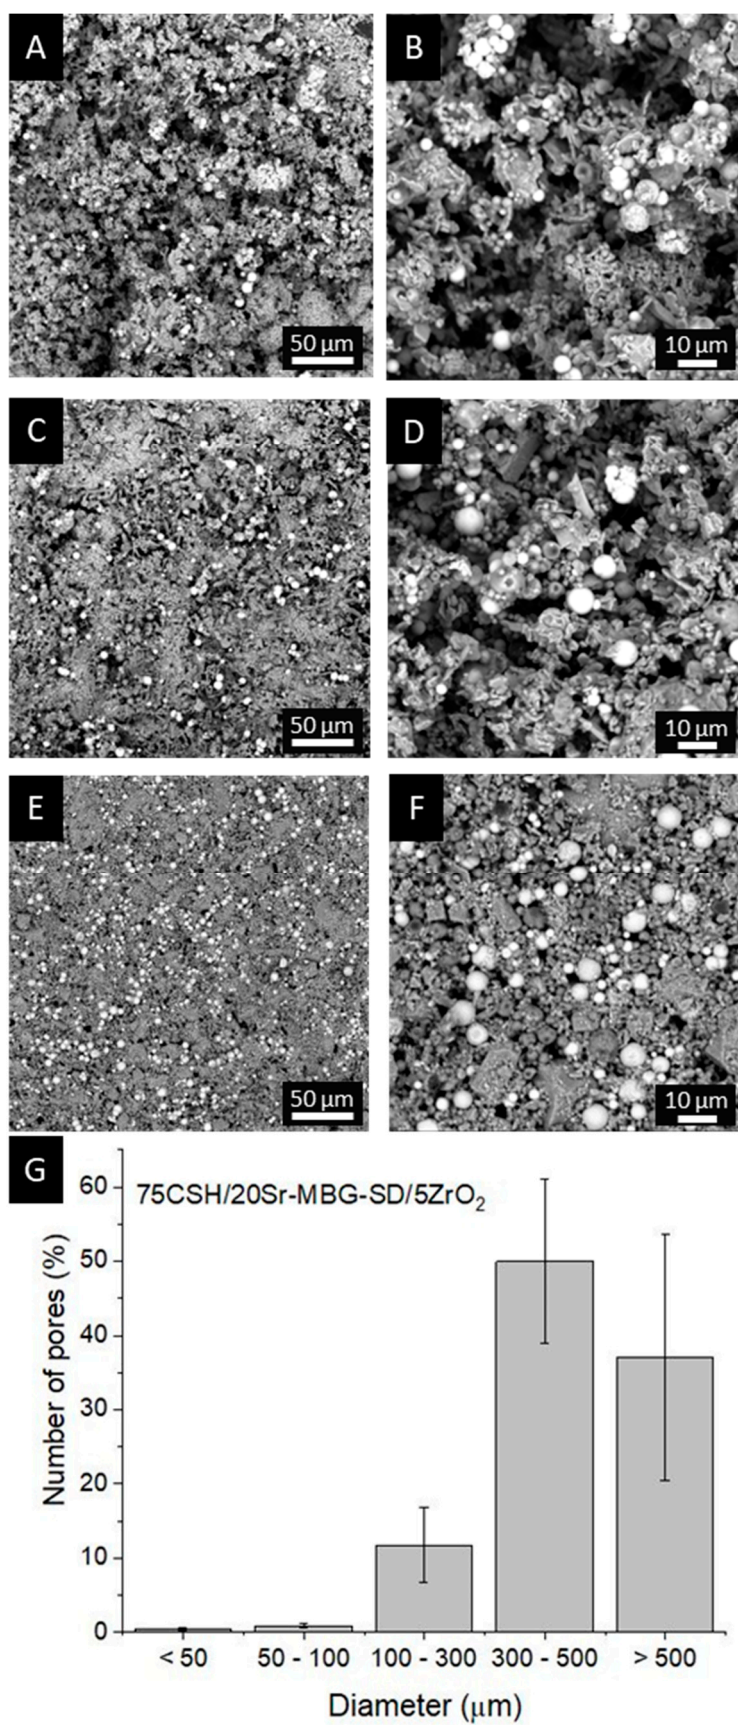

**Figure S3.** SEM images of cement formulations containing Sr-MBG-SD acquired at 1,000 $\times$  and 3,000 $\times$ : (A-B) 75CSH/20Sr-MBG-SD/5ZrO<sub>2</sub>, (C-D) 80CSH/15Sr-MBG-SD/5ZrO<sub>2</sub>, (E-F) 85CSH/10Sr-MBG-SD/5ZrO<sub>2</sub>. (G) Pore size distribution of the 75CSH/20Sr-MBG-SD/5ZrO<sub>2</sub> formulation.

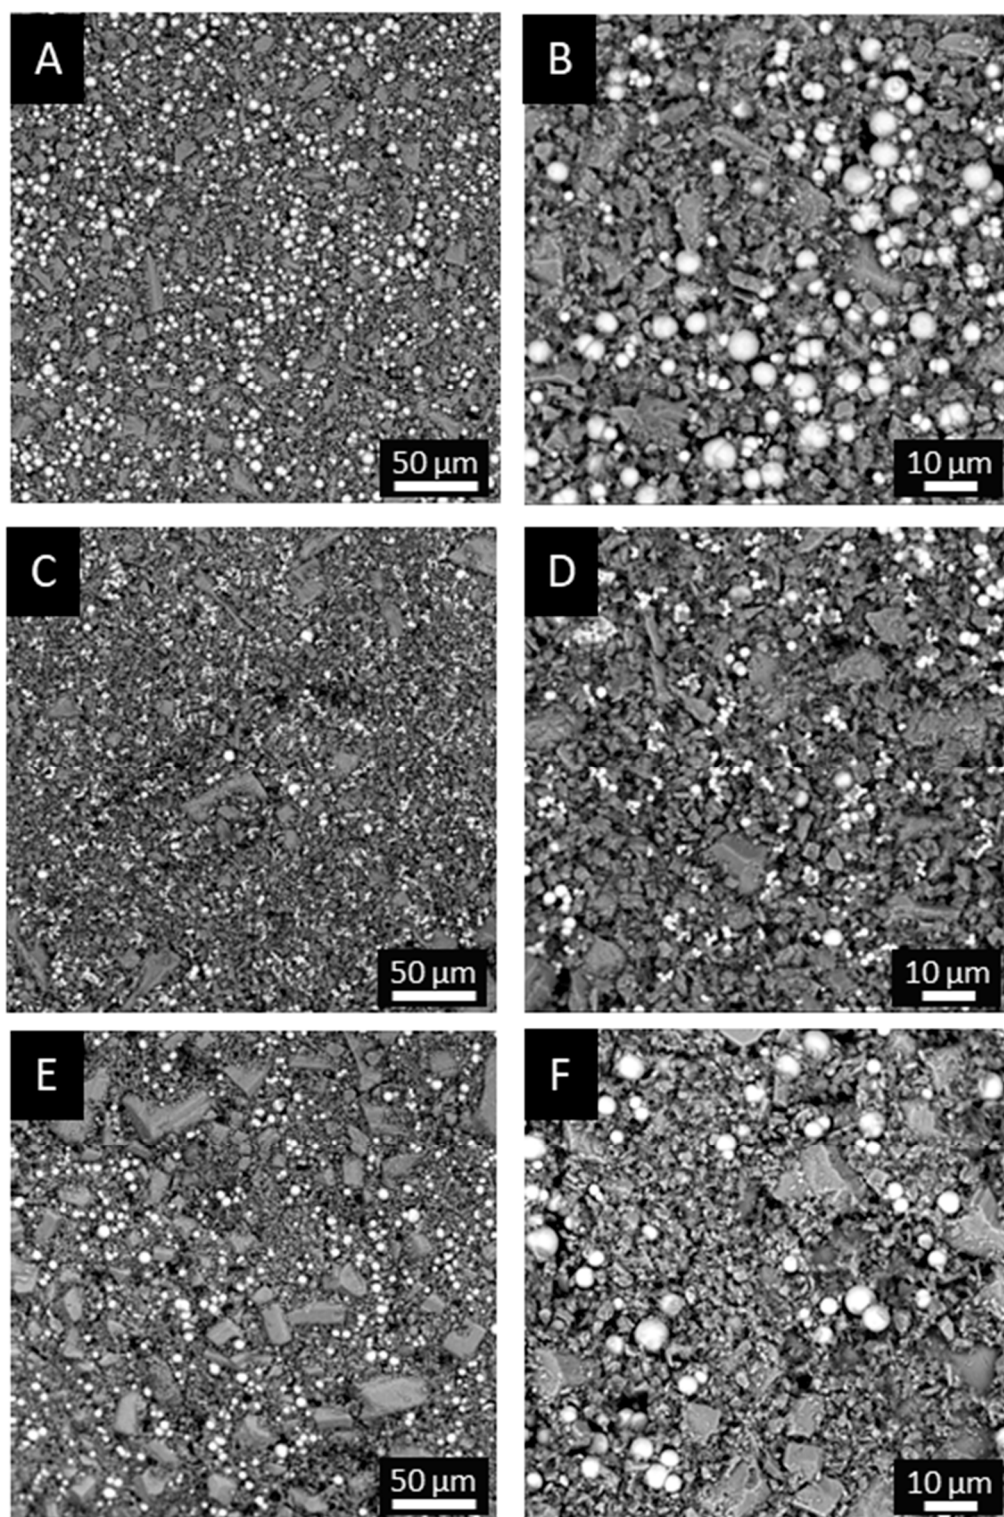

**Figure S4.** SEM images of cement formulations containing Sr-MBG-SG acquired at 1,000× and 3,000×: (A-B) 75CSH/20Sr-MBG-SG/5ZrO<sub>2</sub>, (C-D) 80CSH/15Sr-MBG-SG/5ZrO<sub>2</sub> and (E-F) 85CSH/10Sr-MBG-SG/5ZrO<sub>2</sub>.



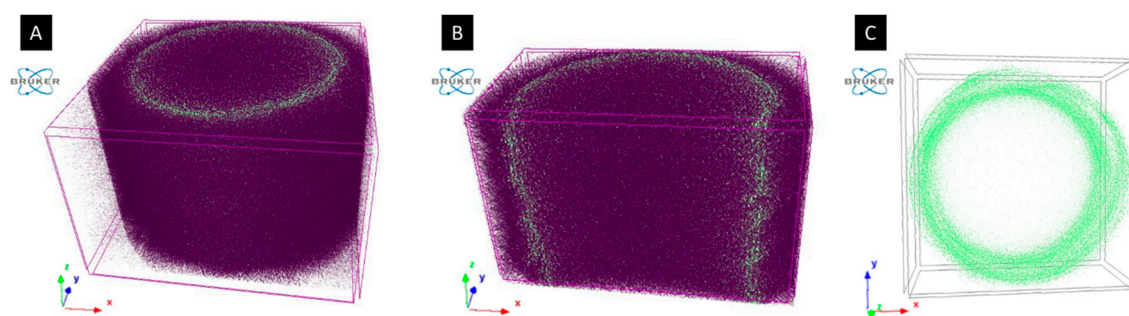

**Figure S5.** Radiopacity distribution of Cerament® visualized by means of CTVox software: (A) total volume, (B) cross-section and (C) only the radiopaque phase. Colors legend: CSD matrix in purple, and radiopaque element in green.

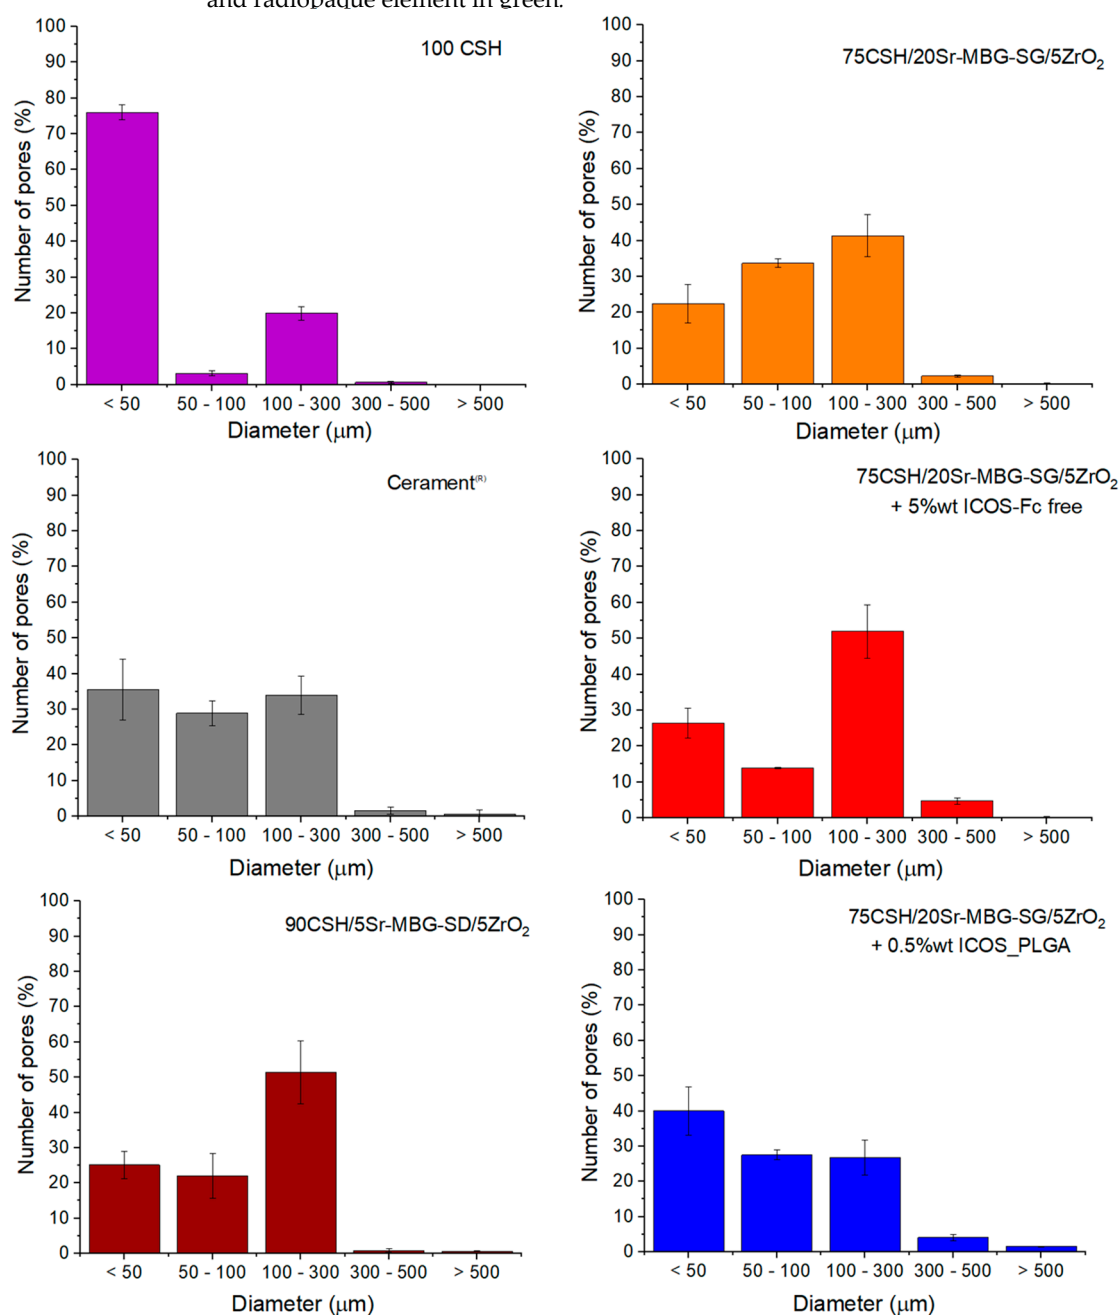

**Figure S6.** Pore size distributions of the investigated cements calculated through individual 3D analyses.

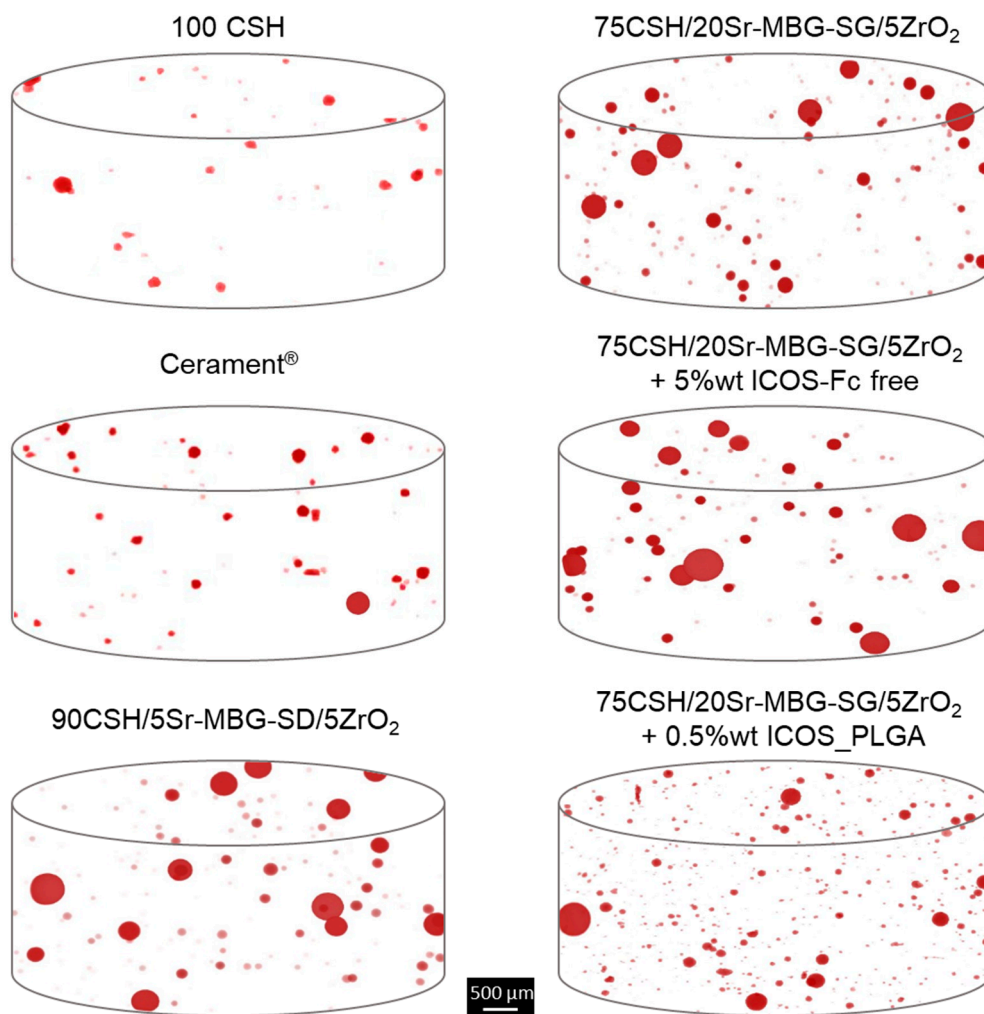

**Figure S7.** Qualitative representations of the pore distribution throughout the cement volumes obtained by using the Micro-CT software.

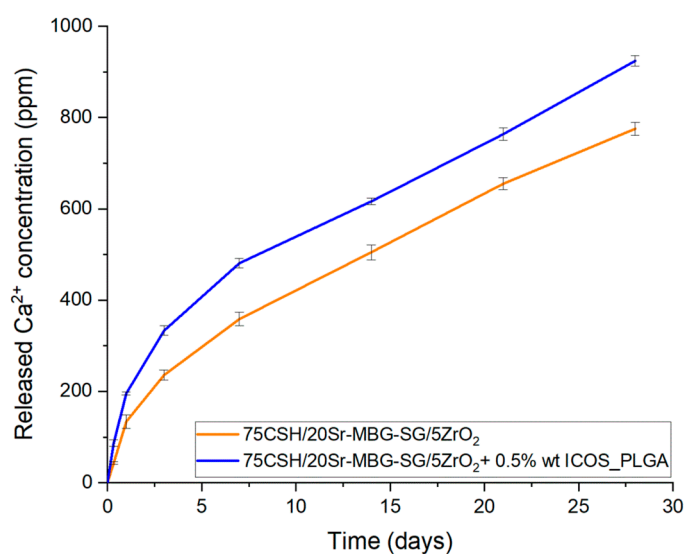

**Figure S8.** Calcium ion release kinetics from the optimized composite cement formulation with (orange line) and without (blue line) ICOS\_PLGA.
